# Supplementary material
Source: PubMed Central journal article supplement (PMC3219119)
Supplement: 1110905108_pnas.201110905SI.pdf [file 1110905108_pnas.201110905SI.pdf]

# Supporting Information

Farrow et al. 10.1073/pnas.1110905108

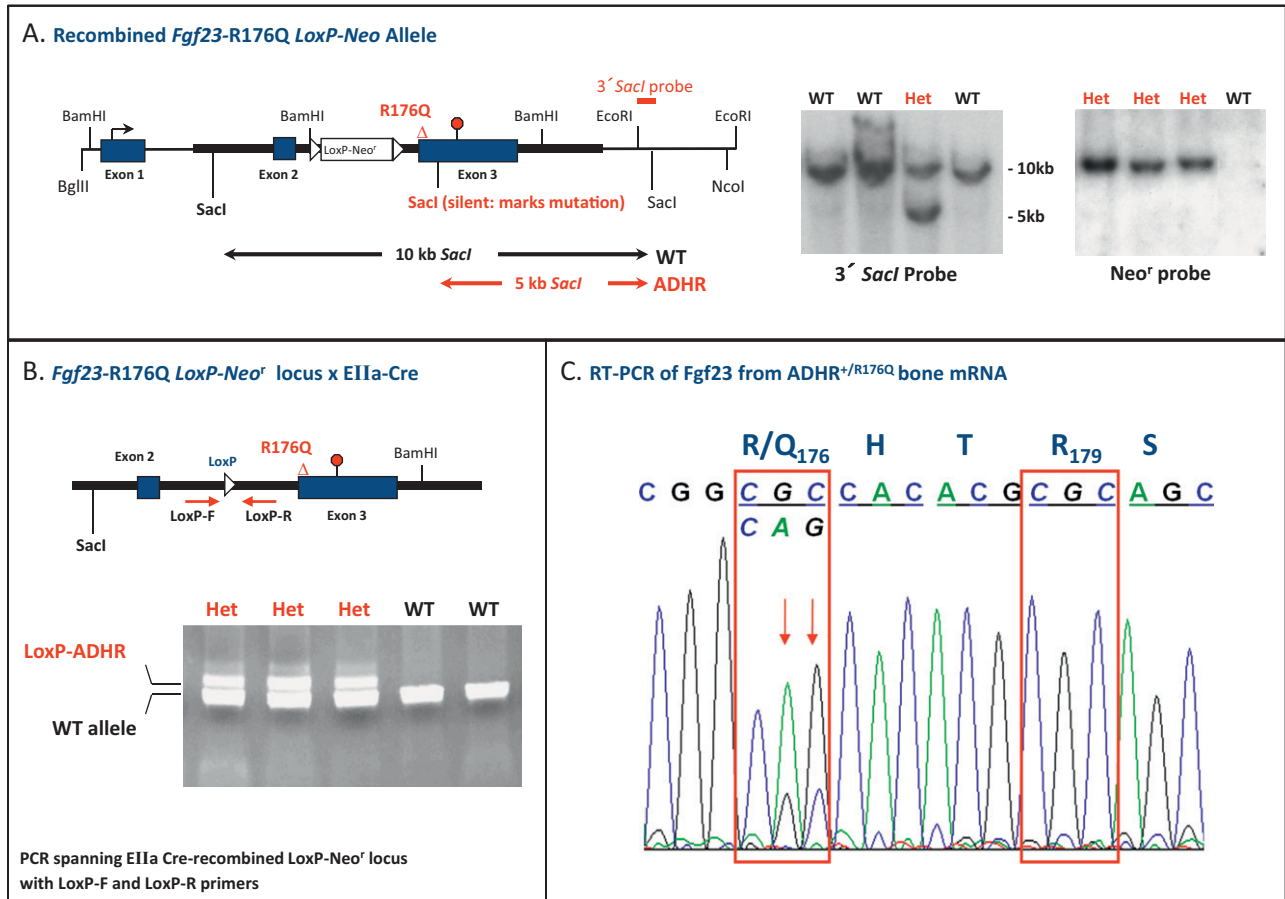

**Fig. S1.** Gene targeting for development of an autosomal dominant hypophosphatemic rickets (ADHR) mouse carrying the R176Q-fibroblast growth factor 23 (*Fgf23*) allele. (A) (Left) Targeting strategy for the mouse R176Q-*Fgf23* ADHR allele. The R176Q ADHR mutation was introduced (triangle) into exon 3 of the mouse *Fgf23* gene. A floxed-neomycin resistance gene (*Neo*<sup>+</sup>) cassette was placed into intron 2, and a silent *SacI* site was introduced into exon three, 3' to the R176Q mutation. (Right) Southern analyses with *SacI* digests on DNA lysates from ES cells and a 3' external probe detected the R176Q-ADHR allele as a 5-kb band, in contrast to the 10-kb WT band. Het, ADHR heterozygous R176Q cells; WT, homozygous wild-type cells. Offspring from founder mice were positive for the floxed-*Neo*<sup>+</sup> cassette. (B) The *LoxP*-*Neo*<sup>+</sup> cassette in the R176Q-ADHR allele was removed by breeding to an *EIIa*-*Cre* transgenic mouse as shown by PCR analyses within intron 2. A slightly larger PCR product in the Het mice contained the *LoxP* site that remained following *Cre*-mediated recombination. (C) Sequence analysis of *Fgf23* RT-PCR products from heterozygous ADHR mouse bone mRNA demonstrated properly spliced ADHR-mutant and WT *Fgf23* mRNAs (WT codon: cgc; ADHR codon: cag, arrows). The R(Q)<sub>176</sub>H(R)<sub>179</sub>S<sub>180</sub> protein sequence comprising the *Fgf23* SPC site is shown above the sequence traces for orientation.

**Table S1. Complete blood cell counts in WT and ADHR mice**

| Genotype and diet  | Mean corpuscular volume (fL) | Mean corpuscular hemoglobin (pg) | Hemoglobin (g/dL)           | Hematocrit (%)  | Red blood cell distribution width (%) | Red blood cells (M/ $\mu$ L) |
|--------------------|------------------------------|----------------------------------|-----------------------------|-----------------|---------------------------------------|------------------------------|
| WT control diet    | 46.1 $\pm$ 0.68              | 14.4 $\pm$ 0.17                  | 10.2 $\pm$ 1.0              | 32.9 $\pm$ 3.19 | 18.3 $\pm$ 0.87                       | 7.1 $\pm$ 0.65               |
| WT low-iron diet   | 38.4 $\pm$ 1.20*             | 10.1 $\pm$ 0.16*                 | 7.1 $\pm$ 0.68 <sup>†</sup> | 27.2 $\pm$ 2.87 | 28.7 $\pm$ 1.86 <sup>†</sup>          | 6.99 $\pm$ 0.65              |
| ADHR control diet  | 45.7 $\pm$ 0.56              | 14.7 $\pm$ 0.38                  | 9.5 $\pm$ 0.96              | 29.4 $\pm$ 2.81 | 16.84 $\pm$ 0.36                      | 6.44 $\pm$ 0.63              |
| ADHR low-iron diet | 35.8 $\pm$ 1.07*             | 11.3 $\pm$ 0.37*                 | 6.9 $\pm$ 0.97 <sup>‡</sup> | 21.8 $\pm$ 2.99 | 22.2 $\pm$ 1.35 <sup>‡</sup>          | 6.04 $\pm$ 0.78              |

*n* = 9–11 mice per cohort.

\**P* < 0.001.

<sup>†</sup>*P* < 0.05.

<sup>‡</sup>*P* < 0.08.

**Table S2. Biochemistries for heterozygous ADHR mice**

| Biochemistry               | Control diet 8 wk | Low-iron diet 8 wk              | Control diet 12 wk | Low-iron diet 12 wk             |
|----------------------------|-------------------|---------------------------------|--------------------|---------------------------------|
| Intact Fgf23 (pg/mL)       | 135.4 $\pm$ 9.1   | 86.9 $\pm$ 8.3*                 | 123.3 $\pm$ 14.0   | 71.8 $\pm$ 15.0*                |
| C-terminal Fgf23 (pg/mL)   | 356.0 $\pm$ 19.5  | 1297.1 $\pm$ 264.2 <sup>†</sup> | 327.8 $\pm$ 28.0   | 1687.6 $\pm$ 286.0 <sup>†</sup> |
| Serum phosphorus (mg/dL)   | 10.3 $\pm$ 0.27   | 8.75 $\pm$ 0.38*                | 10.19 $\pm$ 0.37   | 8.49 $\pm$ 0.25*                |
| Serum calcium (mg/dL)      | 10.1 $\pm$ 0.10   | 10.25 $\pm$ 0.10                | 10.3 $\pm$ 0.18    | 10.3 $\pm$ 0.12                 |
| Alkaline phosphatase (U/L) | 116.1 $\pm$ 6.1   | 136.5 $\pm$ 9.1*                | 100.9 $\pm$ 8.6    | 108.1 $\pm$ 5.2                 |
| Serum creatinine (mg/dL)   | 0.34 $\pm$ 0.03   | 0.34 $\pm$ 0.04                 | 0.36 $\pm$ 0.04    | 0.37 $\pm$ 0.04                 |

*n* = 11–23 mice per cohort.

\**P* < 0.01.

<sup>†</sup>*P* < 0.0001.
